# Supplementary material for: Isolation of Yeast and LAB from Dry Coffee Pulp and Monitoring of Organic Acids in Inoculated Green Beans
Source: MDPI journal article supplement (doi:10.3390/foods12132622), 2023-07-06

Supplementary Table S1. Organic acids quantified in the fermented coffee beans with different yeast isolates

| Acids/ time (h) | Treatments   | Y5R          | Y10W         | Y12aR        | Y12bR        | Y18W         | Y19W         | Y38W         | Y43W         | Control   |
|-----------------|--------------|--------------|--------------|--------------|--------------|--------------|--------------|--------------|--------------|-----------|
| Acetic          |              |              |              |              |              |              |              |              |              |           |
| 24              | 0.55±0.01*   | 0.46±0.01    | 0.51±0.04    | 0.49±0.01    | 0.54±0.10*   | 0.47±0.01    | 0.50±0.01    | 0.53±0.01    | 0.47±0.00    | 0.45±0.01 |
| 48              | 0.52±0.01    | 0.50±0.03    | 0.53±0.01    | 0.58±0.02*   | 0.67±0.05*** | 0.53±0.02    | 0.57±0.02*   | 0.60±0.05**  | 0.58±0.06*   | 0.47±0.02 |
| 72              | 1.13±0.01*** | 0.56±0.04*   | 0.61±0.02**  | 0.60±0.03**  | 1.33±0.28*** | 0.58±0.03**  | 0.62±0.03*** | 0.60±0.02**  | 0.64±0.05*** | 0.46±0.02 |
| Citric          |              |              |              |              |              |              |              |              |              |           |
| 24              | 0.41±0.03**  | 0.51±0.03    | 0.58±0.13    | 0.48±0.08*   | 0.58±0.15    | 0.64±0.05    | 0.49±0.05    | 0.53±0.10    | 0.45±0.03*   | 0.61±0.21 |
| 48              | 0.38±0.01**  | 0.63±0.02    | 0.47±0.04    | 0.82±0.22*** | 0.47±0.04    | 0.54±0.07    | 0.49±0.05    | 0.52±0.05    | 0.55±0.05    | 0.57±0.18 |
| 72              | 0.14±0.00*** | 0.45±0.12*** | 0.45±0.03*** | 0.48±0.11*** | 0.22±0.02*** | 0.42±0.04*** | 0.45±0.13*** | 0.45±0.07*** | 0.44±0.02*** | 0.72±0.19 |
| Formic          |              |              |              |              |              |              |              |              |              |           |
| 24              | 0.42±0.02*** | 0.45±0.01*** | 0.44±0.02*** | 0.44±0.01*** | 0.43±0.03*** | 0.46±0.01**  | 0.42±0.01*** | 0.45±0.03*** | 0.45±0.02*** | 0.49±0.05 |
| 48              | 0.43±0.01    | 0.45±0.01    | 0.40±0.00*** | 0.41±0.00*** | 0.40±0.00*** | 0.45±0.00    | 0.40±0.00*** | 0.40±0.00*** | 0.43±0.02    | 0.45±0.01 |
| 72              | 0.40±0.01    | 0.41±0.01    | 0.40±0.00    | 0.40±0.00    | 0.40±0.00    | 0.40±0.00    | 0.40±0.00    | 0.40±0.00    | 0.40±0.00    | 0.42±0.02 |
| Lactic          |              |              |              |              |              |              |              |              |              |           |
| 24              | 0.29±0.02    | 0.30±0.01    | 0.31±0.01    | 0.29±0.00    | 0.45±0.11    | 0.33±0.03    | 0.30±0.01    | 0.29±0.01    | 0.41±0.04    | 0.40±0.11 |
| 48              | 0.44±0.02    | 0.30±0.00    | 0.29±0.01    | 0.48±0.12    | 0.31±0.03    | 0.39±0.12    | 0.33±0.06    | 0.29±0.01    | 0.45±0.11    | 0.37±0.12 |
| 72              | 2.41±0.03*** | 0.30±0.01    | 0.30±0.01    | 0.41±0.09    | 2.21±0.78*** | 0.40±0.13    | 0.30±0.00    | 0.31±0.07    | 0.39±0.06    | 0.34±0.04 |
| Malic           |              |              |              |              |              |              |              |              |              |           |
| 24              | 0.45±0.03    | 0.47±0.02    | 0.55±0.10**  | 0.45±0.03    | 0.54±0.06**  | 0.54±0.01**  | 0.42±0.00    | 0.49±0.06    | 0.41±0.05    | 0.43±0.04 |
| 48              | 0.33±0.01*** | 0.52±0.01    | 0.43±0.04    | 0.57±0.07**  | 0.43±0.04    | 0.50±0.05    | 0.48±0.02    | 0.48±0.02    | 0.45±0.05    | 0.48±0.05 |
| 72              | 0.27±0.01*** | 0.41±0.03    | 0.46±0.03    | 0.45±0.06    | 0.30±0.10*** | 0.35±0.05*   | 0.45±0.05    | 0.44±0.01    | 0.38±0.07*   | 0.47±0.11 |
| Quinic          |              |              |              |              |              |              |              |              |              |           |
| 24              | 1.15±0.07*   | 1.49±0.18*** | 1.38±0.09**  | 1.44±0.16*** | 1.91±0.23*** | 1.76±0.35*** | 1.18±0.14*   | 1.57±0.43*** | 1.32±0.11**  | 0.74±0.27 |
| 48              | 1.25±0.09*   | 1.83±0.09    | 1.25±0.16*   | 1.43±0.14    | 2.36±0.65**  | 1.75±0.40    | 1.52±0.40    | 1.64±0.32    | 1.74±0.03    | 1.73±0.41 |
| 72              | 0.50±0.02*** | 1.26±0.32**  | 1.50±0.12    | 1.49±0.38    | 0.49±0.19*** | 1.76±0.10    | 1.12±0.14*** | 1.29±0.15*   | 1.37±0.20*   | 1.88±0.70 |
| Succinic        |              |              |              |              |              |              |              |              |              |           |
| 24              | 0.24±0.01*** | 0.23±0.00*** | 0.24±0.01*** | 0.24±0.01*** | 0.24±0.01*** | 0.23±0.00*** | 0.25±0.00*** | 0.25±0.00*** | 0.23±0.00*** | 0.38±0.13 |
| 48              | 0.24±0.01    | 0.25±0.00    | 0.24±0.01    | 0.27±0.00    | 0.25±0.00    | 0.25±0.01    | 0.25±0.00    | 0.26±0.01    | 0.25±0.01    | 0.23±0.00 |
| 72              | 0.28±0.03    | 0.24±0.01    | 0.26±0.01    | 0.25±0.01    | 0.29±0.02*   | 0.24±0.01    | 0.25±0.01    | 0.25±0.01    | 0.25±0.01    | 0.25±0.03 |
| Total           |              |              |              |              |              |              |              |              |              |           |
| 24              | 3.51±0.12    | 3.91±0.23    | 4.00±0.36    | 3.82±0.21    | 4.70±0.44*** | 4.43±0.29**  | 3.56±0.19    | 4.11±0.57*   | 3.74±0.17    | 3.51±0.16 |
| 48              | 3.59±0.13*   | 4.47±0.13    | 3.62±0.22*   | 4.55±0.27    | 4.90±0.64*   | 4.43±0.59    | 4.03±0.53    | 4.21±0.43    | 4.46±0.15    | 4.29±0.77 |
| 72              | 5.14±0.07    | 3.62±0.50**  | 3.97±0.18    | 4.08±0.67    | 5.25±0.85*   | 3.60±0.14    | 3.89±0.69**  | 4.00±0.22*   | 3.88±0.16*   | 4.54±0.95 |
| Average         | 4.08±0.03    | 4.00±0.19    | 3.86±0.10    | 4.15±0.25    | 4.95±0.20*   | 4.15±0.23    | 3.83±0.26    | 4.11±0.17    | 4.03±0.01    | 4.11±0.42 |

Results are presented as mean ± SD ( $n = 4$ ) of organic acids (mg/g). For each row, concentration denoted with star labels are significantly different from control (\* for  $p < .05$ , \*\* for  $p < .01$ , \*\*\* for  $p < .001$ )

Supplementary Table S2. Organic acids quantified in the fermented coffee beans with different lactic acid bacteria isolates

| Acids    | Time (h) | Treatments   |              |              |              |              |              |              |              |              |              |              |           |
|----------|----------|--------------|--------------|--------------|--------------|--------------|--------------|--------------|--------------|--------------|--------------|--------------|-----------|
|          |          | L4           | L5           | L6           | L6b          | L8           | L10          | L12          | L14          | L16          | L17          | L17b         | Control   |
| Acetic   | 12       | 0.47±0.01    | 0.48±0.01    | 0.46±0.01    | 0.47±0.01    | 0.47±0.01    | 0.48±0.03    | 0.49±0.01    | 0.49±0.02    | 0.46±0.01    | 0.47±0.01    | 0.47±0.01    | 0.47±0.01 |
|          | 24       | 0.48±0.01    | 0.48±0.02    | 0.46±0.00    | 0.47±0.01    | 0.48±0.02    | 0.48±0.03*   | 0.47±0.00    | 0.49±0.01*   | 0.47±0.01    | 0.47±0.01    | 0.45±0.01    | 0.45±0.00 |
|          | 48       | 0.47±0.00    | 0.46±0.01    | 0.48±0.02    | 0.45±0.00    | 0.47±0.01    | 0.47±0.01    | 0.46±0.01    | 0.44±0.01    | 0.52±0.11**  | 0.47±0.01    | 0.49±0.01*   | 0.45±0.01 |
|          | 72       | 0.48±0.01    | 0.45±0.01    | 0.47±0.00    | 0.46±0.01    | 0.47±0.01    | 0.46±0.02    | 0.47±0.01    | 0.46±0.02    | 0.46±0.00    | 0.46±0.02    | 0.49±0.02    | 0.46±0.00 |
| Citric   | 12       | 0.78±0.23    | 0.55±0.07*** | 0.52±0.07*** | 0.57±0.01*** | 0.55±0.04*** | 0.73±0.06    | 0.63±0.09*   | 0.68±0.04    | 0.50±0.01*** | 0.71±0.10    | 0.55±0.02*** | 0.79±0.01 |
|          | 24       | 0.54±0.05    | 0.47±0.03    | 0.45±0.03    | 0.48±0.04    | 0.52±0.04    | 1.09±0.10*** | 0.81±0.08*** | 0.56±0.03    | 0.62±0.01*   | 0.43±0.00    | 0.49±0.01    | 0.47±0.03 |
|          | 48       | 0.50±0.01    | 0.39±0.03    | 0.47±0.03    | 0.30±0.07*   | 0.50±0.05    | 0.48±0.04    | 0.47±0.02    | 0.34±0.02*   | 0.49±0.01    | 0.46±0.02    | 0.5±0.01     | 0.46±0.02 |
|          | 72       | 0.86±0.20*** | 0.77±0.14**  | 0.51±0.15    | 0.75±0.29*   | 0.73±0.14    | 0.88±0.06*** | 0.80±0.22**  | 0.63±0.01    | 0.69±0.01    | 0.59±0.01    | 0.66±0.00    | 0.61±0.03 |
| Formic   | 12       | 0.44±0.01    | 0.44±0.00    | 0.44±0.01    | 0.44±0.02    | 0.44±0.02    | 0.46±0.01*   | 0.45±0.01    | 0.45±0.02    | 0.41±0.01*** | 0.45±0.01    | 0.42±0.02*   | 0.44±0.01 |
|          | 24       | 0.46±0.01*** | 0.45±0.02*** | 0.44±0.01    | 0.43±0.01    | 0.44±0.01    | 0.45±0.01**  | 0.44±0.02*   | 0.45±0.02*** | 0.44±0.01*   | 0.44±0.01*   | 0.42±0.01    | 0.42±0.01 |
|          | 48       | 0.44±0.02    | 0.44±0.01    | 0.45±0.01    | 0.41±0.01*** | 0.46±0.01    | 0.46±0.00    | 0.43±0.01*   | 0.44±0.00    | 0.46±0.01    | 0.47±0.00*   | 0.43±0.01*   | 0.45±0.00 |
|          | 72       | 0.46±0.01*** | 0.41±0.01    | 0.42±0.02    | 0.42±0.01    | 0.47±0.01*** | 0.45±0.01**  | 0.45±0.01*** | 0.44±0.01*   | 0.48±0.01*** | 0.43±0.01    | 0.48±0.01*** | 0.42±0.01 |
| Lactic   | 12       | 0.34±0.01    | 0.44±0.02*** | 0.32±0.02    | 0.30±0.01    | 0.48±0.03*** | 0.46±0.03*** | 0.47±0.06*** | 0.39±0.03**  | 0.31±0.01    | 0.40±0.02*** | 0.34±0.02    | 0.31±0.01 |
|          | 24       | 0.30±0.02    | 0.31±0.01    | 0.30±0.01    | 0.33±0.02    | 0.32±0.03    | 0.34±0.02    | 0.35±0.02    | 0.37±0.01*   | 0.44±0.01*** | 0.30±0.01    | 0.34±0.02    | 0.32±0.01 |
|          | 48       | 0.31±0.02    | 0.32±0.02    | 0.33±0.01    | 0.32±0.02    | 0.41±0.10*** | 0.33±0.01    | 0.38±0.05**  | 0.33±0.03    | 0.40±0.04*** | 0.37±0.02**  | 0.40±0.03*** | 0.30±0.00 |
|          | 72       | 0.33±0.01    | 0.32±0.02    | 0.42±0.12**  | 0.37±0.06    | 0.33±0.02    | 0.35±0.02    | 0.41±0.05**  | 0.42±0.02**  | 0.49±0.01*** | 0.33±0.01    | 0.43±0.04*** | 0.33±0.06 |
| Malic    | 12       | 0.51±0.06    | 0.40±0.02*** | 0.47±0.03    | 0.47±0.02    | 0.42±0.02*** | 0.47±0.03    | 0.44±0.02**  | 0.51±0.00    | 0.40±0.01*** | 0.47±0.00    | 0.43±0.02**  | 0.51±0.01 |
|          | 24       | 0.48±0.03    | 0.45±0.04    | 0.45±0.03    | 0.45±0.02    | 0.48±0.03    | 0.49±0.04    | 0.43±0.04    | 0.48±0.01    | 0.47±0.01    | 0.40±0.01*   | 0.50±0.00    | 0.46±0.03 |
|          | 48       | 0.45±0.02    | 0.38±0.02*** | 0.48±0.03    | 0.39±0.01*** | 0.45±0.01    | 0.50±0.01    | 0.43±0.02*   | 0.39±0.02*** | 0.42±0.01*   | 0.46±0.01    | 0.54±0.01*   | 0.48±0.01 |
|          | 72       | 0.60±0.05*   | 0.53±0.06    | 0.47±0.10**  | 0.55±0.10    | 0.53±0.05    | 0.63±0.03*** | 0.55±0.08    | 0.56±0.01    | 0.54±0.01    | 0.49±0.02*   | 0.63±0.01*** | 0.54±0.01 |
| Quinic   | 12       | 1.89±0.71*** | 1.25±0.17    | 1.24±0.17    | 1.24±0.11    | 1.13±0.12    | 1.40±0.20    | 1.46±0.18    | 1.52±0.07    | 0.95±0.04    | 1.42±0.06    | 1.18±0.1     | 1.23±0.05 |
|          | 24       | 1.73±0.18*   | 1.26±0.09    | 1.31±0.16    | 1.27±0.20    | 1.61±0.16    | 1.41±0.22    | 1.37±0.15    | 1.37±0.03    | 1.19±0.50    | 1.11±0.02    | 1.38±0.05    | 1.24±0.08 |
|          | 48       | 1.65±0.12    | 1.05±0.15*   | 1.50±0.20    | 0.96±0.05**  | 1.46±0.07    | 1.40±0.05    | 1.44±0.05    | 0.93±0.03**  | 1.29±0.06    | 1.51±0.02    | 1.61±0.09    | 1.55±0.01 |
|          | 72       | 2.85±0.43*** | 2.26±0.60*   | 1.91±0.50    | 2.09±0.72    | 2.16±0.44    | 2.26±0.32*   | 2.51±0.64*** | 1.74±0.50    | 2.14±0.04    | 1.87±0.11    | 2.13±0.09    | 1.81±0.15 |
| Succinic | 12       | 0.23±0.00    | 0.23±0.00    | 0.23±0.00    | 0.22±0.00    | 0.22±0.00    | 0.23±0.00    | 0.23±0.00    | 0.24±0.00    | 0.23±0.00    | 0.23±0.01    | 0.22±0.00    | 0.22±0.00 |
|          | 24       | 0.22±0.02    | 0.23±0.00    | 0.22±0.00    | 0.22±0.00    | 0.24±0.01    | 0.23±0.01    | 0.23±0.00    | 0.23±0.01    | 0.23±0.01    | 0.23±0.00    | 0.24±0.01    | 0.23±0.01 |
|          | 48       | 0.23±0.01    | 0.22±0.01    | 0.23±0.01    | 0.23±0.01    | 0.23±0.01    | 0.23±0.01    | 0.24±0.00    | 0.22±0.00    | 0.23±0.01    | 0.22±0.00    | 0.23±0.00    | 0.23±0.00 |
|          | 72       | 0.24±0.01    | 0.23±0.01    | 0.23±0.00    | 0.25±0.03    | 0.25±0.02    | 0.24±0.01    | 0.24±0.01    | 0.25±0.01    | 0.24±0.00    | 0.23±0.01    | 0.24±0.00    | 0.24±0.01 |
| Total    | 12       | 4.65±0.98**  | 3.78±0.28    | 3.69±0.28    | 3.70±0.15    | 3.72±0.23    | 4.22±0.30    | 4.16±0.35    | 4.26±0.05    | 3.14±0.16*   | 4.10±0.11    | 3.56±0.08    | 3.83±0.29 |
|          | 24       | 4.20±0.27**  | 3.65±0.15    | 3.64±0.19    | 3.66±0.28    | 4.08±0.25*   | 4.49±0.36*** | 4.10±0.24*   | 3.94±0.04    | 3.80±0.47    | 3.31±0.12    | 3.82±0.07    | 3.51±0.27 |
|          | 48       | 4.04±0.15    | 3.26±0.18*   | 3.93±0.25    | 3.07±0.11**  | 3.98±0.18    | 3.87±0.06    | 3.85±0.04    | 3.10±0.02**  | 3.80±0.18    | 3.92±0.07    | 4.14±0.09    | 3.93±0.00 |
|          | 72       | 5.82±0.66*** | 4.96±0.84*   | 4.43±0.81    | 4.89±1.20*   | 4.93±0.64*   | 5.27±0.45*** | 5.43±0.99*** | 4.49±0.49    | 5.05±0.06**  | 4.40±0.14    | 5.06±0.08**  | 4.22±0.29 |
| Average  |          | 4.68±0.90    | 3.91±0.77    | 3.92±0.52    | 3.83±0.88    | 4.18±0.58    | 4.46±0.61    | 4.39±0.80    | 3.95±0.59    | 3.95±0.75    | 3.93±0.43    | 4.14±0.59    | 3.87±0.34 |

Results are presented as mean ± SD ( $n = 4$ ) of organic acids (mg/g). For each row, concentration denoted with star labels are significantly different from control (\* for  $p < .05$ , \*\* for  $p < .01$ , \*\*\* for  $p < .001$ )

Supplementary Figure S1. Flow chart of fermentation process in section 2.4

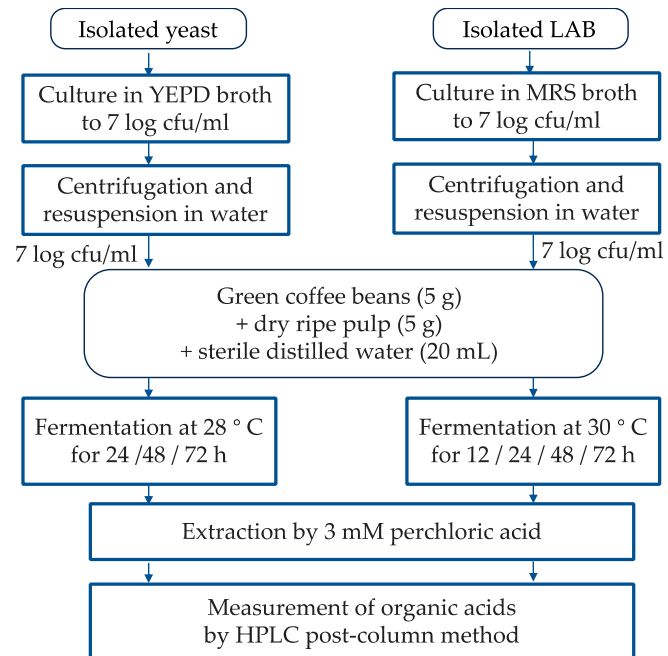

Supplement: s1 [file s1]
